# Supplementary material for: Controlled growth and ion intercalation mechanism of monocrystalline niobium pentoxide nanotubes for advanced rechargeable aluminum-ion batteries
Source: Royal Society of Chemistry journal article supplement (doi:10.1039/d0nr01981j), 2020-01-01
Supplement: d0nr01981j1.pdf [file d0nr01981j1.pdf]

## Supporting Information for:

# Controlled Growth and Ion Intercalation Mechanism of Monocrystalline Niobium Pentoxide Nanotubes for Advanced Rechargeable Aluminum-Ion Batteries

### Authors:

Lei Wang,<sup>1,#</sup> Huinan Lin,<sup>1,#</sup> Weihua Kong,<sup>1</sup> Yi Hu,<sup>1</sup> Renpeng Chen,<sup>1</sup> Peiyang Zhao,<sup>1</sup>

Mohammadreza Shokouhimehr,<sup>3</sup> Xiao Li Zhang,<sup>4</sup> Zuoxiu Tie,<sup>1</sup> and Zhong Jin<sup>1,2\*</sup>

### Affiliations:

<sup>1</sup> *Key Laboratory of Mesoscopic Chemistry of MOE, School of Chemistry and Chemical Engineering, Nanjing University, Nanjing, Jiangsu 210023, China.*

<sup>2</sup> *Shenzhen Research Institute of Nanjing University, Shenzhen 518063, China.*

<sup>3</sup> *Department of Materials Science and Engineering, Research Institute of Advanced Materials, Seoul National University, Seoul 08826, Republic of Korea.*

<sup>4</sup> *School of Materials Science and Engineering, Zhengzhou University, Zhengzhou 450001, China.*

*#These authors contributed equally.*

*\*Address correspondence to: [zhongjin@nju.edu.cn](mailto:zhongjin@nju.edu.cn) (Prof. Z. Jin).*

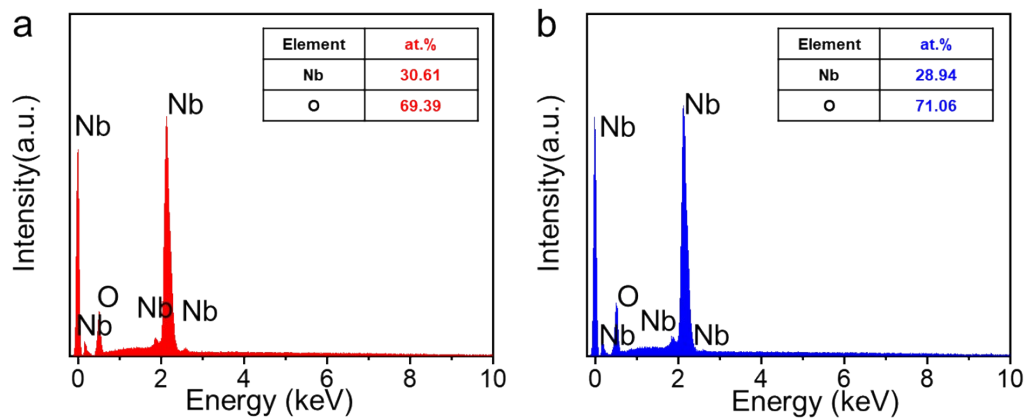

**Figure S1.** EDS analysis of (a) Nb<sub>2</sub>O<sub>5</sub> nanotubes and (b) commercial Nb<sub>2</sub>O<sub>5</sub>, respectively. The insets are the corresponding calculated elemental contents.

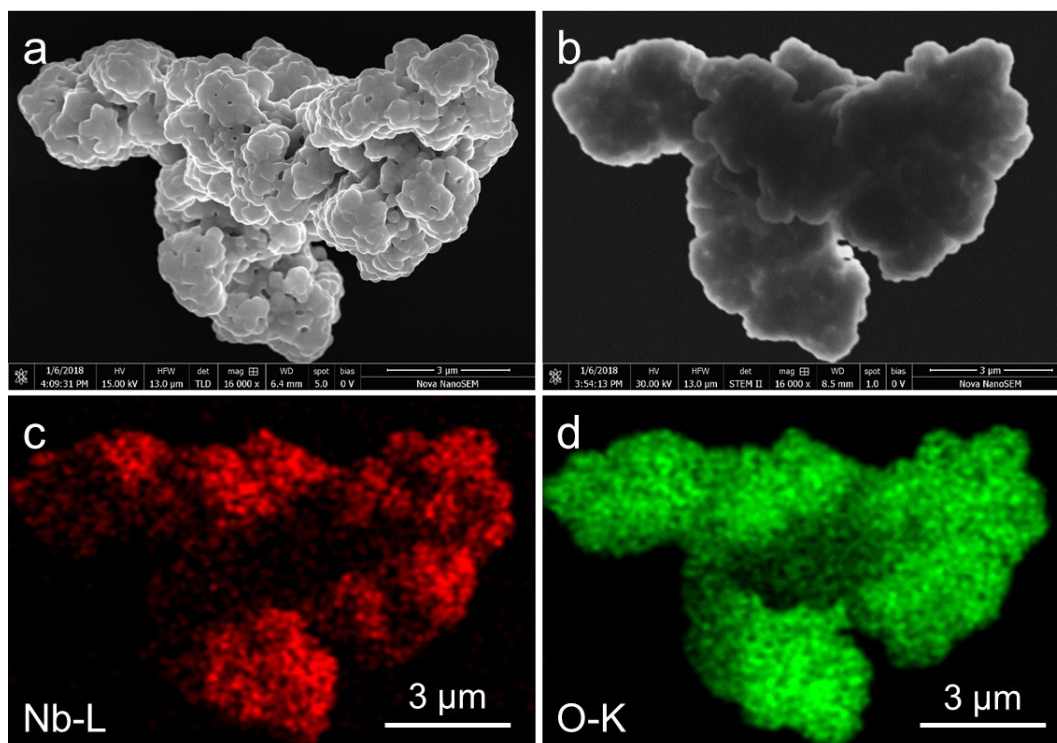

**Figure S2.** Morphology and composition characterizations of commercial Nb<sub>2</sub>O<sub>5</sub> powder as a control sample. (a) SEM image, (b) HAADF-STEM image and (c-d) corresponding EDS elemental mappings of (c) Nb and (d) O, respectively.

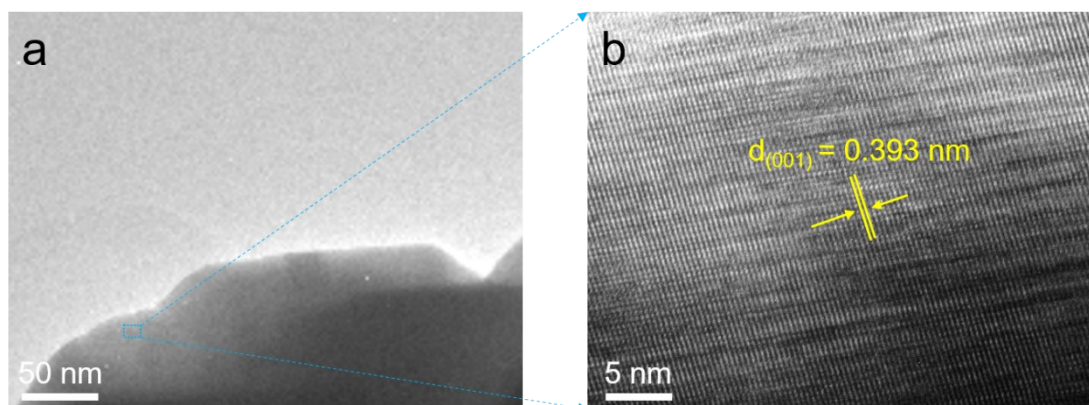

**Figure S3.** (a) TEM and (b) High-resolution TEM images of commercial  $\text{Nb}_2\text{O}_5$  powder.

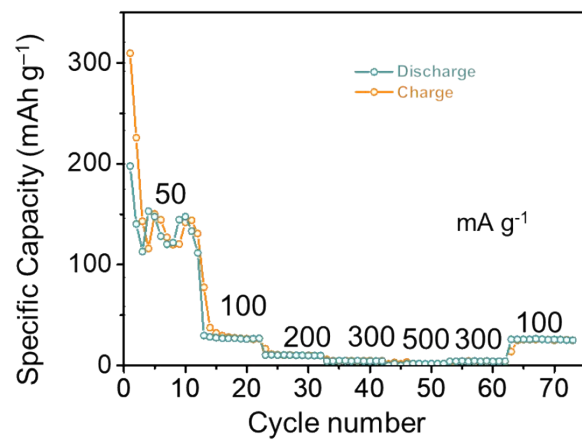

**Figure S4.** Rate performance of commercial Nb<sub>2</sub>O<sub>5</sub> powder as cathode material in RAIBs.

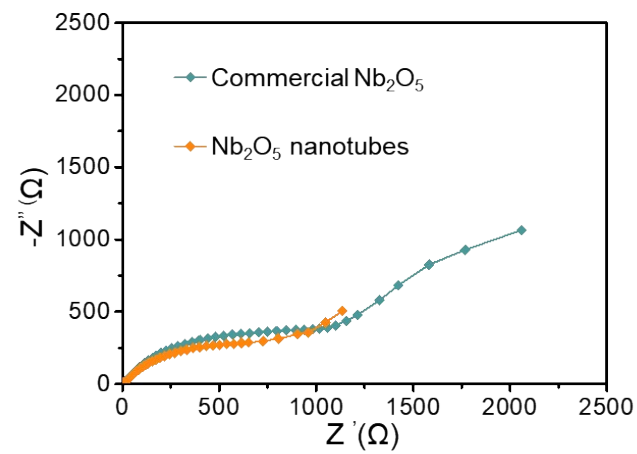

**Figure S5.** EIS analysis of freshly-assembled RAIBs based on Nb<sub>2</sub>O<sub>5</sub> nanotubes and commercial Nb<sub>2</sub>O<sub>5</sub>, respectively.

**Table S1.** Electrochemical performance comparisons of Nb<sub>2</sub>O<sub>5</sub> nanotubes with other previously-reported transition metal oxide or sulfide based cathode materials for RAIBs.

| Ref.             | Cathode material                                      | Current density (mA/g) | Cycle number       | Reversible capacity (mA h/g) |
|------------------|-------------------------------------------------------|------------------------|--------------------|------------------------------|
| <b>This work</b> | <b>Nb<sub>2</sub>O<sub>5</sub> nanotubes</b>          | <b>25</b>              | <b>2 (25 °C)</b>   | <b>556 (25 °C)</b>           |
|                  |                                                       | <b>100</b>             | <b>110 (25 °C)</b> | <b>113 (25 °C)</b>           |
|                  |                                                       |                        | <b>30 (50 °C)</b>  | <b>213 (50 °C)</b>           |
| S1               | CuS@C microspheres                                    | 20                     | 100                | 90                           |
| S2               | Binder-free V <sub>2</sub> O <sub>5</sub>             | 44.2 (0.1 C)           | 5                  | ≤190                         |
| S3               | Amorphous V <sub>2</sub> O <sub>5</sub> /carbon       | 22.1 (0.05 C)          | 30                 | 70                           |
| S4               | VO <sub>2</sub>                                       | 50                     | 100                | 116                          |
| S5               | Al <sub>x</sub> Mo <sub>2.5+y</sub> VO <sub>9+z</sub> | 100                    | 20                 | ≤50                          |
| S6               | MoS <sub>2</sub> microspheres                         | 40                     | ≤105               | 66.7                         |
| S7               | Ni <sub>3</sub> S <sub>2</sub> @graphene              | 100                    | 100                | ≈60                          |
| S8               | Mo <sub>6</sub> S <sub>8</sub>                        | 12                     | 50                 | ≈70                          |
| S9               | TiO <sub>2</sub>                                      | 20                     | 3                  | ≤120                         |

### Supporting References

[S1] S. Wang, S. Jiao, J. Wang, H.S. Chen, D. Tian, H. Lei, D. N. Fang, ACS Nano, 2017, 11, 469-477.

[S2] H. Wang, Y. Bai, S. Chen, X. Luo, C. Wu, F. Wu, J. Lu, K. Amine, ACS Appl. Mater. Interfaces, 2015, 7, 80–84.

[S3] M. Chiku, H. Takeda, S. Matsumura, E. Higuchi, H. Inoue, ACS Appl. Mater. Interfaces, 2015, 7, 24385-9.

- [S4] W. Wang, B. Jiang, W. Xiong, H. Sun, Z. Lin, L. Hu, J. Tu, J. Hou, H. Zhu, S. Jiao, *Sci. Rep.*, 2013, 3, 3383.
- [S5] W. Kaveevivitchai, A. Huq, S. Wang, M. J. Park, A. Manthiram, *Small*, 2017, 13, 1701296.
- [S6] Z. Li, B. Niu, J. Liu, J. Li, F. Kang, *ACS Appl. Mater. Interfaces*, 2018, 10, 9451–9459 .
- [S7] S. Wang, Z. Yu, J. Tu, J. Wang, D. Tian, Y. Liu, S. Jiao, *Adv. Energy. Mater.*, 2016, 6, 1600137.
- [S8] L. Geng, G. Lv, X. Xing, J. Guo, *Chem. Mater.*, 2015, 27, 4926–4929.
- [S9] T. Koketsu, J. Ma, B. J. Morgan, M. Body, C. Legein, W. Dachraoui, M. Giannini, A. Demortière, M. Salanne, F. Dardoize, H. Groult, O. J. Borkiewicz, K. W. Chapman, P. Strasser, D. Dambournet, *Nat. Mater.*, 2017, 16, 1142–1148.



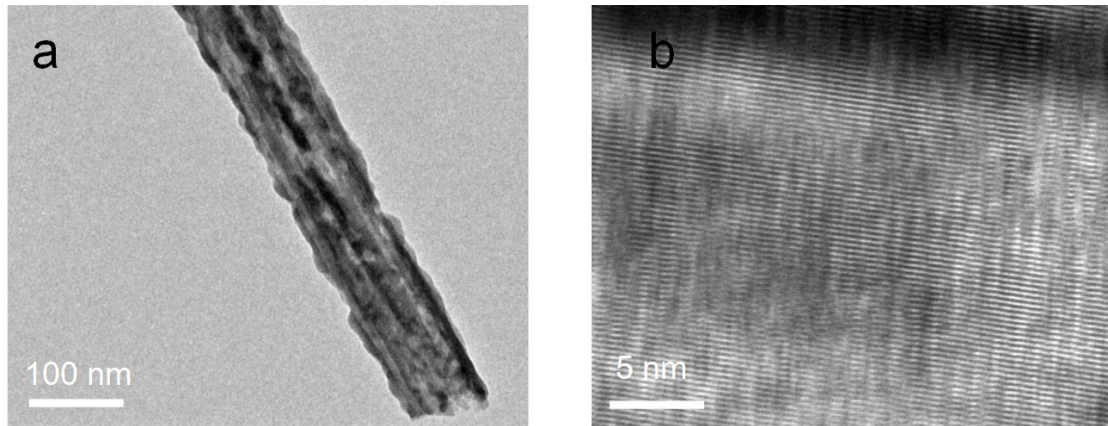

**Figure S6.** (a) TEM and (b) HRTEM images of a fully-discharged Nb<sub>2</sub>O<sub>5</sub> nanotube after 2 charge/discharge cycles.
